# Supplementary material
Source: PubMed Central journal article supplement (PMC406456)
Supplement: pnas_101_18_7005__2.pdf [file pnas_101_18_7005__2.pdf]

**Table 1. Hybridization design**

| Initial developmental stage        | <b>Aggregation</b>                         | <b>Finger</b> | <b>Mexican hat</b> |
|------------------------------------|--------------------------------------------|---------------|--------------------|
| Number of biological replicates    | 2                                          | 2             | 4*                 |
| Number of hybridization reactions  | 2 of 1st biol. rep.<br>1 of 2nd biol. rep. | 3 each        | 2 each             |
| Biol. rep. $\times$ hybridizations | 3                                          | 6             | 8                  |
| Total replicates <sup>†</sup>      | 6                                          | 12            | 16                 |

The experimental samples were RNAs extracted from cells at different time points during dedifferentiation. The common reference sample was a pool of RNAs from cells at different time points during development.

\*The Mexican hat stage was harder to collect from because of its short duration, so more biological replications were needed.

<sup>†</sup>The total number of replicates is  $2 \times \text{biol. rep.} \times \text{hybridizations}$  because each target is printed twice on each array.
